# Supplementary material
Source: PubMed Central journal article supplement (PMC2869381)

Supplemental Table 1: Primers used in this study.

| Real-time RT-PCR primers               |                                |                                |
|----------------------------------------|--------------------------------|--------------------------------|
| Gene (mouse)                           | Forward                        | Reverse                        |
| CA II                                  | AATGTGTGACCTGGATCGTGC          | ACGCTTTGATCTTTCTATTCTTTAGCGG   |
| c-fms                                  | CACGGCCACCATGAACTTCC           | GTCCAGTTGTAATGCTGTATGCTAGGGTA  |
| CLCN7                                  | CAATGCCAAAGAGATCGCCA           | GGAGGAGGAAAGACGAATCAACCA       |
| Ctsk                                   | ATCTTGTGGACTGTGTGACTGAGAATTA   | GCCGTGGCGTTATACATACAACTT       |
| CTR                                    | CCTATCAGCACTGCCCTGACTAC        | TTGCAGTTTCTCAGAAGTGAAAGCG      |
| Oscar                                  | CTGGAAGTCTGGTAACGGAT           | CCAGGGCTGCACAGAGTCAATA         |
| Ostm1                                  | AGTCGAACCTTCAACTGTTCGG         | GACGTTTGGGTAGAATGAGTTTTCG      |
| RANK                                   | ATAGAATTCGCCATGGCCCCGCGCGCC    | GCGAGATCTTCATTCTGCACATTGTCC    |
| GAPDH                                  | CTGGTGCTGCCAAGGCT              | CTGCTTCACCACCTTCTTGATGTCATCATA |
| Semi-qRT-PCR Primers for cell cultures |                                |                                |
| Gene (Human)                           | Forward                        | Reverse                        |
| Mitf-A                                 | Ref (Hershey and Fisher, 2005) | TGCTTCAGACTCTGTGGGAAAAT        |
| Mitf-B                                 |                                |                                |
| Mitf-C                                 |                                |                                |
| Mitf-D                                 |                                |                                |
| Mitf-E                                 |                                |                                |
| Mitf-H                                 |                                |                                |
| Mitf-J                                 |                                |                                |
| Mitf-M                                 |                                |                                |
| Mitf-CM                                | Ref (Shiohara et al., 2008)    |                                |
| Mitf-total                             | Ref (Hershey and Fisher, 2005) | Ref (Hershey and Fisher, 2005) |
| Gene (Mouse)                           | Forward                        | Reverse                        |
| Mitf-A                                 | ATGCAGTCCGAATCGGGAAAT          | TTGCTTCAGACTCTGTGGGGAAAAT      |
| Mitf-B                                 | Ref (Hershey and Fisher, 2005) |                                |
| Mitf-C                                 |                                |                                |
| Mitf-D                                 |                                |                                |
| Mitf-E                                 |                                |                                |
| Mitf-H                                 |                                |                                |
| Mitf-J                                 |                                |                                |
| Mitf-M                                 |                                |                                |
| Mitf-Mc                                |                                |                                |
| Mitf-total                             |                                |                                |

| Gene (human)                                                                                                                                                                                                                                                                                                                                                                                      | Semi-qRT-PCR Primers for FFPE tissues               |                                                                                              |
|---------------------------------------------------------------------------------------------------------------------------------------------------------------------------------------------------------------------------------------------------------------------------------------------------------------------------------------------------------------------------------------------------|-----------------------------------------------------|----------------------------------------------------------------------------------------------|
| Mitf-A                                                                                                                                                                                                                                                                                                                                                                                            | CGAACTCAAAAGTCAACCG<br>CTG                          | TCATACTGGAGGAGCTTATCGGAG                                                                     |
| Mitf-E                                                                                                                                                                                                                                                                                                                                                                                            | CTATAGGATGGCTTCCCAGG<br>AGTT                        |                                                                                              |
| Mitf-total                                                                                                                                                                                                                                                                                                                                                                                        | CCAGCCAACCTTCCCAACAT                                | GGCCAGTGCTCTTGCTTCAG                                                                         |
| CD68                                                                                                                                                                                                                                                                                                                                                                                              | CTACCTGAGCTACATGGCGG                                | GAATGTCCACTGTGCTGCGT                                                                         |
| c-fms                                                                                                                                                                                                                                                                                                                                                                                             | CCCGGAACAACCTGCAGT                                  | TCCACCACCTTCCCAAAGGC                                                                         |
|                                                                                                                                                                                                                                                                                                                                                                                                   | Cloning Primers: gene sequences underlined          |                                                                                              |
| Gene (Mouse)                                                                                                                                                                                                                                                                                                                                                                                      | Forward                                             | Reverse                                                                                      |
| Mitf-A                                                                                                                                                                                                                                                                                                                                                                                            | (1)<br><u>ATGCAGTCCGAATCGGGA</u>                    | For MSCViG vector: (contains an HA tag)<br>TAAGTCGACC <u>CACACGCATGCTCCGT</u><br><u>TTCT</u> |
|                                                                                                                                                                                                                                                                                                                                                                                                   | (2)<br>AGATCTACCATGGCGATGCA<br><u>GTCCGA</u>        |                                                                                              |
| Mitf-E                                                                                                                                                                                                                                                                                                                                                                                            | (1)<br><u>ATGACATCACGCATCTTGCT</u><br><u>ACGC</u>   | For pcDNA6.2 vector: (no tag)<br>GCGAATTCCTAACACGCATGCTCCG<br><u>TTTCTT</u>                  |
|                                                                                                                                                                                                                                                                                                                                                                                                   | (2)<br>AGATCTACCATGGTGATGAC<br><u>ATCACGCATCTTG</u> |                                                                                              |
| Mitf-B                                                                                                                                                                                                                                                                                                                                                                                            | (1)<br><u>ATGCTGTGTGCCTTCTGG</u>                    |                                                                                              |
|                                                                                                                                                                                                                                                                                                                                                                                                   | (2)<br>AGATCTACCATGGTGATGCT<br><u>GTGTGCCTTCTGG</u> |                                                                                              |
| Mitf-H                                                                                                                                                                                                                                                                                                                                                                                            | (1)<br><u>ATGGAGGCGCTTAGATTT</u>                    |                                                                                              |
|                                                                                                                                                                                                                                                                                                                                                                                                   | (2)<br>AGATCTAAGATGGAGGCGC<br><u>TTAGATTTGAGATG</u> |                                                                                              |
| NOTE: Mitf sequences were amplified from mouse osteoclast derived cDNA with two overlapping forward primers to provide a Kozak sequence. The resulting PCR products were cloned into pCR-Blunt II- TOPO (invitrogen) before subsequently cut with BglII and SalI and inserted into MSCViG linearized by the same restriction enzymes. The PCR products were cloned into pCDNA6.2 by TOPO cloning. |                                                     |                                                                                              |

## Figure Legends For Supplement Data

**Supplemental Table 1.** Primers used in this study.

**Supplemental Figure 1.** Verification of proper differentiation by mBMM, hPBMC and RAW264.7 cells cultured under macrophage or osteoclast conditions. RAW264.7 cells were plated in media with or without RANKL (100 ng/ml) for osteoclast or macrophage cultures, respectively. Left panel: TRAP staining of cell cultures. Right panel: Toluidine blue stain of resorption areas. Scale bar, 500  $\mu$ m.

**Supplemental Figure 2.** Mitf-E signal declines in the absence of RANKL replenish. Time course of Mitf-E transcript by semi-qRT-PCR in RAW264.7 cells incubated in media containing 100 ng/mL. GAPDH serves as a cDNA loading control. A: Replenish media with RANKL 100 ng/mL on 48h. B: Replenish media without RANKL on 48h. C: No media change on 48h.

# TRAP Stain

# Pit Assay

Macrophage

Osteoclast

Osteoclast

mBMM

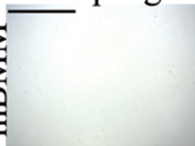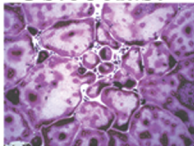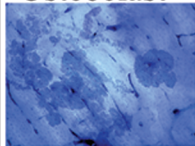

hPBMC

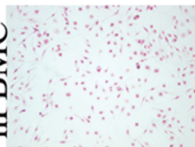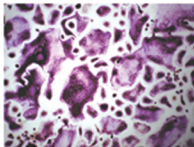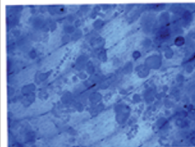

RAW

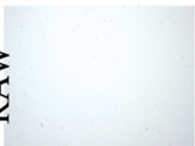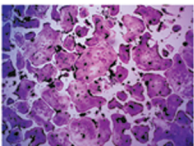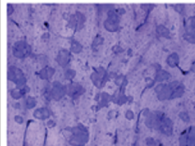

Supplement: E09-07-0584_1.pdf [file E09-07-0584_1.pdf]
